# Supplementary material
Source: PubMed Central journal article supplement (PMC8579935)
Supplement: spectrum00668-21_supp_1_seq6.pdf [file spectrum00668-21_supp_1_seq6.pdf]

- 1 **Table S1.** Retrospective testing results between the direct RNA extraction method and virus  
 2 isolation distinguished by different rRT-PCR assays.

| Sabin 1        |          | Virus Isolation |          |
|----------------|----------|-----------------|----------|
|                |          | Positive        | Negative |
| RNA extraction |          |                 |          |
|                | Positive | 21              | 13       |
|                | Negative | 1               | 7        |
|                | Total    | 42              |          |

- 3 (McNemar's:  $P = 0.003$ )

| Sabin 2        |          | Virus Isolation |          |
|----------------|----------|-----------------|----------|
|                |          | Positive        | Negative |
| RNA extraction |          |                 |          |
|                | Positive | 26              | 4        |
|                | Negative | 1               | 2        |
|                | Total    | 33              |          |

- 4 (McNemar's:  $P = 0.4$ )

Sabin 3

Virus Isolation

| RNA extraction | Positive | Negative |
|----------------|----------|----------|
| Positive       | 11       | 4        |
| Negative       | 1        | 3        |
| Total          | 19       |          |

5 (McNemar's:  $P = 0.4$ )

WPV1

Virus Isolation

| RNA extraction | Positive | Negative |
|----------------|----------|----------|
| Positive       | 61       | 9        |
| Negative       | 7        | 8        |
| Total          | 85       |          |

6 (McNemar's:  $P = 0.8$ )

PV Type 2

Virus Isolation

| RNA extraction | Positive | Negative |
|----------------|----------|----------|
| Positive       | 21       | 1        |
| Negative       | 7        | 4        |
| Total          | 33       |          |

7 (McNemar's:  $P = 0.08$ )

WPV3

Virus Isolation

RNA extraction

|          | Positive | Negative |
|----------|----------|----------|
| Positive | 3        | 0        |
| Negative | 1        | 0        |
| Total    |          | 4        |

8 (McNemar's:  $P = 1$ )
